# Supplementary material
Source: Springer Nature journal article supplement (https://www.springermedizin.de/resource/supplementary/12893_2008_136_MOESM3_ESM.pdf/9513058)

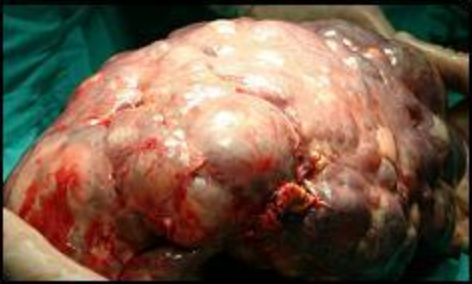

Supplement: MOESM3 [file 9513058]
